# Supplementary material for: Using Diaper Waste to Prepare Magnetic Catalyst for the Synthesis of Glycerol Carbonate
Source: Hindawi journal article supplement (doi:10.1155/2020/9403714), 2020-10-29
Supplement: f1 [file 9403714.f1.docx]

**Supporting Information**

**USING DIAPER WASTE TO PREPARE MAGNETIC CATALYST FOR THE SYNTHESIS OF GLYCEROL CARBONATE**

Jincan Wanga, Yong Liangb; Song Wanga*; Patrick U. Okoyec; Yue Zhoua; Jiening Xua; Zhenhao Menga; Lei Wanga; Sanxi Lia

a: School of Science, Shenyang University of Technology, Shenyang, 110870, China

b: Liaoning Hanking Green Building Materials Co., LTD., Fushun, 113000, China

c: Laboratorio de Bioenergía, Instituto de Energías Renovables (IER-UNAM), Temixco Morelos, 62580, México

**Content**

| **Item** | **Page** |
| --- | --- |
| Figure. S1  Scheme S1 | 3  4 |
| Table S1 | 5 |
| Figure. S2 | 6 |
| Table S2 | 7 |

Figure S1: XRD of the catalysts prepared above 600 oC in the 2θ range of 5° - 30°.

Since the feedstock for the catalyst preparation included nickel nitrate and diaper waste (mainly composed of fluff pulp, sodium polyacrylate, and non-woven polypropylene), the main possible reactions happened during the calcination process were as follows:

Scheme S1: The main possible reactions happened during the calcination process.

Table S1: The detailed reaction condition.

| Investigation parameter | Reaction time (min) | Reaction temperature (℃) | Catalyst amount (wt.%) | DMC to glycerol molar ratio |
| --- | --- | --- | --- | --- |
| Effect of reaction time | 30 – 150 | 75 | 3 | 3:1 |
| Effect of reaction temperature | 90 | 65 – 85 | 3 | 3:1 |
| Effect of DMC to glycerol molar ratio | 90 | 75 | 3 | 1: 1 – 5: 1 |
| Effect of Catalyst amount | 90 | 75 | 1 – 9 | 3:1 |

**Figure S2:** Reusability of the DW-Ni-700 in the transesterification of glycerol with DMC.

Table S2: Elemental composition of the DW-Ni-700 and the reused DW-Ni-700

| Element | DW-Ni-700 | Reused DW-Ni-700 |
| --- | --- | --- |
| C | 12.8 | 13.2 |
| Na | 28.4 | 21.2 |
| O | 29.9 | 35.5 |
| Ni | 25.5 | 26.7 |
| N | 2.4 | 2.5 |
| Cl | 0.2 | 0.2 |
| K | 0.9 | 0.7 |
